# Supplementary material for: Dairy products consumption and metabolic syndrome in adults: systematic review and meta-analysis of observational studies
Source: PubMed Central journal article supplement (PMC4586521; doi:10.1038/srep14606), 2015-09-29
Supplement: srep14606-s1.pdf [file srep14606-s1.pdf]

# **Dairy products consumption and metabolic syndrome in adults: systematic review and meta-analysis of observational studies**

Guo-Chong Chen<sup>1</sup>, Ignatius M.Y. Szeto<sup>2</sup>, Li-Hua Chen<sup>1</sup>, Shu-Fen Han<sup>1</sup>, Yan-Jie Li<sup>2</sup>, Rina van Hekezen<sup>3</sup>, Li-Qiang Qin<sup>1</sup>

<sup>1</sup>Department of Nutrition and Food Hygiene, School of Public Health, Soochow University, Suzhou, 215123, China

<sup>2</sup>Yili Innovation Center, Inner Mongolia Yili Industrial Group Co., Ltd., Hohhot, 010110, China

<sup>3</sup>Yili R&D Center (The Netherlands) B.V., 6708 PB Wageningen, Netherlands.

Supplementary figure captions:

Supplementary Figure S1. Sensitivity analysis for cross-sectional/case-control studies, omitting one at a time with the remaining studies pooled.

Supplementary Figure S2. Sensitivity analysis for prospective cohort studies, omitting one at a time with the remaining studies pooled.

Supplementary Table S1. Characteristics of excluded studies and reasons for exclusion

| Study                                       | Design          | Results for diary                                                                                                                                                                                                      | Reasons for exclusion                                                       |
|---------------------------------------------|-----------------|------------------------------------------------------------------------------------------------------------------------------------------------------------------------------------------------------------------------|-----------------------------------------------------------------------------|
| van Meijl, 2009 <sup>1</sup>                | Cross-sectional | Low-fat dairy is beneficial for systolic blood pressure, but not other MetS parameters.                                                                                                                                | Investigating individual parameters of MetS.                                |
| Samara, 2012 <sup>2</sup>                   | Cohort          | Dairy improve metabolic profile in men but not in women.                                                                                                                                                               | Investigating individual parameters of MetS.                                |
| te Velde, 2011 <sup>3</sup>                 | Cohort          | Diary intake during age 13 to 36 years did not affect MetS risk at age 36 years.                                                                                                                                       | Including adolescent population.                                            |
| Shin, 2009 <sup>4</sup>                     | Cohort          | Dairy and milk intake inversely associated with MetS. Dairy: adjusted RR=0.75 (95% CI=0.64-0.88); Milk: adjusted RR=0.79 (95% CI=0.67-0.92)                                                                            | Duplicate publication (results for milk was included in the meta-analysis). |
| Yoo, 2004 <sup>5</sup>                      | Cross-sectional | Low-fat dairy intake was higher in subjects who had no risk factors for MetS than those who had 1 to 2 risk factors.                                                                                                   | Investigating individual parameters of MetS.                                |
| Høstmark, 2012 <sup>6</sup>                 | Cross-sectional | Cheese intake inversely associated with MS, adjusted OR=0.97 (95% CI=0.94-0.99)                                                                                                                                        | Dairy analyzed as a continuous variable.                                    |
| Uenishi, 2010 <sup>7</sup><br>(in Japanese) | Cross-sectional | Calcium intake from dairy reduce MetS in non-smoking women (adjusted OR=0.60, 95% CI=0.41-0.87), but not in smoking men (adjusted OR=1.13, 95% CI=0.85- 1.51) or non-smoking men (adjusted OR=0.80, 95% CI=0.60 -1.06) | Using calcium as an indicator of dairy intake.                              |
| Kouki, 2011 <sup>8</sup>                    | Cross-sectional | None.                                                                                                                                                                                                                  | No results on dairy.                                                        |
| Høstmark, 2011 <sup>9</sup>                 | Cross-sectional | Cheese intake inversely associated with MS, adjusted OR=0.96 (95% CI=0.95-0.97)                                                                                                                                        | Dairy analyzed as a continuous variable                                     |
| Wang , 2011 <sup>10</sup><br>(in Chinese )  | Case-control    | Dairy intake inversely associated with MS, adjusted OR=0.78 (95% CI=0.62-0.99)                                                                                                                                         | Dairy analyzed as a continuous variable                                     |
| Al-Daghri, 2013 <sup>11</sup>               | Cross-sectional | None.                                                                                                                                                                                                                  | No results on dairy.                                                        |
| Bain, 2013 <sup>12</sup>                    | Case-control    | None.                                                                                                                                                                                                                  | No results on dairy.                                                        |
| Bruscato, 2010 <sup>13</sup>                | Cross-sectional | None.                                                                                                                                                                                                                  | No results on dairy.                                                        |
| Carnethon, 2004 <sup>14</sup>               | Cohort          | None.                                                                                                                                                                                                                  | No results on dairy.                                                        |
| Eilat-Adar, 2008 <sup>15</sup>              | Cross-sectional | None.                                                                                                                                                                                                                  | No results on dairy.                                                        |
| Cabello-Saavedra, 2010 <sup>16</sup>        | Cross-sectional | None.                                                                                                                                                                                                                  | No results on dairy.                                                        |
| Kwaśniewska, 2009 <sup>17</sup>             | Cross-sectional | None.                                                                                                                                                                                                                  | No results on dairy.                                                        |
| Michael, 2008 <sup>18</sup>                 | Cross-sectional | None.                                                                                                                                                                                                                  | No results on dairy.                                                        |
| Mirmiran, 2008 <sup>19</sup>                | Cohort          | None.                                                                                                                                                                                                                  | No results on dairy.                                                        |
| Motamed, 2013 <sup>20</sup>                 | Cross-sectional | None.                                                                                                                                                                                                                  | No results on dairy.                                                        |
| Prasad, 2012 <sup>21</sup>                  | Cross-sectional | None.                                                                                                                                                                                                                  | No results on dairy.                                                        |
| Reppert, 2008 <sup>22</sup>                 | Cross-sectional | None.                                                                                                                                                                                                                  | No results on dairy.                                                        |

CI, confidence interval; MetS, metabolic syndrome; OR, odds ration; RR, relative risk.

## References

1. van Meijl, L.E. & Mensink, R.P. Low-fat dairy consumption reduces systolic blood pressure, but does not improve other metabolic risk parameters in overweight and obese subjects. *Nutr Metab Cardiovasc Dis* **21**, 355-361 (2011).
2. Samara, A. *et al.* Dairy product consumption, calcium intakes, and metabolic syndrome-related factors over 5 years in the STANISLAS study. *Nutrition* **29**, 519-524 (2013).
3. te Velde, S.J. *et al.* Dairy intake from adolescence into adulthood is not associated with being overweight and metabolic syndrome in adulthood: the Amsterdam Growth and Health Longitudinal Study. *J Hum Nutr Diet* **24**, 233-244 (2011).
4. Shin, H., Yoon, Y.S., Lee, Y., Kim, C.I. & Oh, S.W. Dairy product intake is inversely associated with metabolic syndrome in Korean adults: Anseong and Ansan cohort of the Korean Genome and Epidemiology Study. *J Korean Med Sci* **28**, 1482-1488 (2013).
5. Yoo, S. *et al.* Comparison of dietary intakes associated with metabolic syndrome risk factors in young adults: the Bogalusa Heart Study. *Am J Clin Nutr* **80**, 841-848 (2004).
6. Hostmark, A.T. & Haug, A. Does cheese intake blunt the association between soft drink intake and risk of the metabolic syndrome? Results from the cross-sectional Oslo Health Study. *BMJ Open* **2**(2012).
7. Uenishi, K. *et al.* Milk, Dairy Products and Metabolic Syndrome: A Cross-sectional Study of Japanese. *J Jpn Soc Nutr Food Sci* **63**, 151-159 (2010).
8. Kouki, R. *et al.* Food consumption, nutrient intake and the risk of having metabolic syndrome: the DR's EXTRA Study. *Eur J Clin Nutr* **65**, 368-377 (2011).
9. Hostmark, A.T. & Tomten, S.E. The Oslo health study: cheese intake was negatively associated with the metabolic syndrome. *J Am Coll Nutr* **30**, 182-190 (2011).
10. Wang, Y.S. *et al.* [A matched case-control study on the risk factors of metabolic syndrome among policemen]. *Zhonghua Lao Dong Wei Sheng Zhi Ye Bing Za Zhi* **29**, 567-571 (2011).
11. Al-Daghri, N.M. *et al.* Selected dietary nutrients and the prevalence of metabolic syndrome in adult males and females in Saudi Arabia: a pilot study. *Nutrients* **5**, 4587-4604 (2013).
12. Bian, S. *et al.* Dietary nutrient intake and metabolic syndrome risk in Chinese adults: a case-control study. *Nutr J* **12**, 106 (2013).
13. Bruscato, N.M. *et al.* Dietary intake is not associated to the metabolic syndrome in elderly women. *N Am J Med Sci* **2**, 182-188 (2010).
14. Carnethon, M.R. *et al.* Risk factors for the metabolic syndrome: the Coronary Artery Risk Development in Young Adults (CARDIA) study, 1985-2001. *Diabetes Care* **27**, 2707-2715 (2004).
15. Eilat-Adar, S. *et al.* Sex may modify the effects of macronutrient intake on metabolic syndrome and insulin resistance in American Indians: the strong heart study. *J Am Diet Assoc* **108**, 794-802 (2008).
16. Cabello-Saavedra, E. *et al.* Macronutrient intake and metabolic syndrome in subjects at high cardiovascular risk. *Ann Nutr Metab* **56**, 152-159 (2010).
17. Kwasniewska, M., Kaleta, D., Dzionkowska-Zaborszczyk, E. & Drygas, W. Healthy behaviours, lifestyle patterns and sociodemographic determinants of the metabolic syndrome. *Cent Eur J Public Health* **17**, 14-19 (2009).
18. Skilton, M.R., Laville, M., Cust, A.E., Moulin, P. & Bonnet, F. The association between dietary macronutrient intake and the prevalence of the metabolic syndrome. *Br J Nutr* **100**, 400-407 (2008).
19. Mirmiran, P., Noori, N. & Azizi, F. A prospective study of determinants of the metabolic syndrome in adults. *Nutr Metab Cardiovasc Dis* **18**, 567-573 (2008).
20. Motamed, S. *et al.* Micronutrient intake and the presence of the metabolic syndrome. *N Am J Med Sci* **5**, 377-385 (2013).
21. Prasad, D.S., Kabir, Z., Dash, A.K. & Das, B.C. Prevalence and risk factors for metabolic syndrome in Asian Indians: A community study from urban Eastern India. *J Cardiovasc Dis Res* **3**, 204-211 (2012).
22. Reppert, A., Steiner, B.F. & Chapman-Novakofski, K. Prevalence of metabolic syndrome and associated risk factors in Illinois. *Am J Health Promot* **23**, 130-138 (2008).

Supplementary Table S2. Characteristics of included cross-sectional (N=15) and case-control (N=1) studies on dairy products consumption and MetS.

| Study                                  | Dataset<br>(Country)                   | Participants              | Type of<br>dairy | Comparison                               | OR (95% CI)                                      | Dairy assessment         | MetS assessment                                                                                             | Variables accounted for                                                                                                                                             |
|----------------------------------------|----------------------------------------|---------------------------|------------------|------------------------------------------|--------------------------------------------------|--------------------------|-------------------------------------------------------------------------------------------------------------|---------------------------------------------------------------------------------------------------------------------------------------------------------------------|
| Mennen, 2000 <sup>1</sup>              | DESIR<br>(France)                      | 4976 M/F aged<br>30-64 yr | Dairy            | >4 vs. ≤1 portions/d                     | M:<br>0.63 (0.40-0.99)<br>F:<br>0.76 (0.47-2.66) | Self-administered<br>FFQ | ≥2 of the 4<br>components: high<br>fasting glucose, high<br>triglycerides, high BP,<br>low HDL cholesterol. | Age, WHP, smoking, and intakes of energy and alcohol.                                                                                                               |
| Lawlor, 2005 <sup>2</sup>              | BWHHS<br>(UK)                          | 4024 F aged<br>60-79yr    | Milk             | Drinker vs.<br>non-drinker               | 1.82 (1.06-3.03)                                 | Self-administered<br>FFQ | Modified WHO<br>definition                                                                                  | Age, physical activity, smoking, dietary characteristics, and 10 indicators of socioeconomic position.                                                              |
| Azadbakht, 2005 <sup>3</sup>           | TLGS<br>(Iran)                         | 827 M/F aged<br>18-74 yr  | Dairy            | ≥3.1 vs. <1.7 ser/d                      | 0.82 (0.63-0.99)                                 | Interview-based<br>FFQ   | NCEP ATP-III                                                                                                | Age, BMI, physical activity, smoking, use of BP and oestrogen medication, and intakes of energy, fat, calcium and protein.                                          |
| Liu, 2005 <sup>4</sup>                 | WHS<br>(USA)                           | 10066 F aged ≥<br>45yr    | Dairy            | >3.0 vs. <0.91 ser/d                     | 0.66 (0.55-0.80)                                 | Self-administered<br>FFQ | Modified NCEP<br>ATP-III                                                                                    | Age, smoking, physical activity, multivitamin use, parental history of MI, glycemic load, and intakes of total energy, alcohol, total fat, cholesterol and protein. |
| Elwood, 2007 <sup>5</sup>              | Caerphilly cohort<br>(UK)              | 2375 M aged<br>45-59 yr   | Milk             | >1 pint/d vs. little or<br>none.         | 0.38 (0.18-0.78)                                 | Self-administered<br>FFQ | Modified WHO<br>definition                                                                                  | Age, smoking, energy intake and social class.                                                                                                                       |
| Ruidavets, 2007 <sup>6</sup>           | French MONICA<br>centers<br>(France)   | 912 M aged<br>45-64yr     | Dairy            | Q5 vs. Q1<br>(median intake: 175<br>g/d) | 0.64 (0.37-1.09)                                 | Food diary               | NCEP ATP-III                                                                                                | Age, smoking, physical activity, education, center, dieting, drugs for hypertension and dyslipidaemia, intakes of energy and alcohol, and diet quality index.       |
| Snijder, 2007 <sup>7</sup>             | Hoorn Study<br>(the Netherlands)       | 2064 M/F aged<br>50-75 yr | Dairy            | ≥5.57 vs. ≤2.90 ser/d                    | 1.01 (0.74-1.39)                                 | Self-administered<br>FFQ | NCEP ATP-III                                                                                                | Age, sex, physical activity, smoking, education, income, antihypertensive medication use, and intakes of energy, alcohol and fiber.                                 |
| Beydoun, 2008 <sup>8</sup>             | NHANES<br>(USA)                        | 4519 M/F aged<br>≥18yr    | Dairy            | Each 1 ser/d                             | 1.05 (0.97-1.14)                                 | Self-administered<br>FFQ | NCEP ATP-III                                                                                                | Age, sex, and physical activity, ethnicity, socioeconomic status, and energy intake.                                                                                |
| Shin, 2009 <sup>9</sup>                | National Cancer<br>Center<br>(Korea)   | 5337 M aged ≥<br>30yr     | Dairy            | >1 ser/d vs. <2-3<br>ser/mo              | 0.92 (0.75-1.12)                                 | Self-administered<br>FFQ | Modified NCEP<br>ATP-III                                                                                    | Age, smoking, physical activity and family history of T2D.                                                                                                          |
| Troy, 2010 <sup>10</sup><br>(abstract) | Framingham<br>Offspring Study<br>(USA) | 3104 M/F, age<br>N.R      | Dairy            | >3.0 vs. <0.4 ser/d                      | 0.78 (0.60-0.99)                                 | N.R                      | N.R                                                                                                         | Age, sex, smoking, and intakes of energy and alcohol.                                                                                                               |

|                                                                     |                                                                     |                                                                                     |        |                                               |                  |                          |                          |                                                                                                                                   |
|---------------------------------------------------------------------|---------------------------------------------------------------------|-------------------------------------------------------------------------------------|--------|-----------------------------------------------|------------------|--------------------------|--------------------------|-----------------------------------------------------------------------------------------------------------------------------------|
| Zhang, 2010 <sup>11</sup><br>(in Chinese)                           | Communities in<br>Guangzhou Municipal<br>People's Street<br>(China) | 459 M/F aged<br>40-79 yr                                                            | Dairy  | M:<br>128 vs. 0 ml/d;<br>F:<br>219 vs. 0 ml/d | 0.51 (0.16-1.68) | Interview-based<br>FFQ   | IDF                      | Age, sex, smoking, education, income, marital status,<br>and intakes of energy, meat, egg, fruit, vegetable, and<br>soy products. |
| Kwon, 2010 <sup>12</sup>                                            | KNHANES III<br>(Korea)                                              | 4890 M/F aged<br>47.1 yr                                                            | Milk   | ≥1 ser/d vs. rarely                           | 0.85 (0.68-1.06) | Interview-based<br>FFQ   | Modified NCEP<br>ATP-III | Age, sex, BMI, smoking, physical activity, education,<br>and intakes of energy, alcohol and fiber.                                |
| de Oliveira, 2012 <sup>13</sup>                                     | Move for Health<br>program<br>(Brazil)                              | 305 M/F aged<br>54.2 (cases) or<br>55.8 (non-cases)<br>yr                           | Dairy  | ≥3 vs. <3 ser/d                               | 1.6 (0.64-4.03)  | Self-administered<br>FFQ | Modified NCEP<br>ATP-III | Age, sex, BMI, and energy intake.                                                                                                 |
| Hosseinpour-Niazi, 2013 <sup>14</sup><br>(in Persian, case-control) | Subjects consulting<br>health problems in a<br>hospital<br>(Iran)   | 320 M/F aged<br>41.3 yr                                                             | Dairy  | ≥5.7 vs. ≤3.1 ser/d                           | 0.6 (0.2-0.9)    | Interview-based<br>FFQ   | NCEP ATP-III             | Age, sex, BMI, smoking, physical activity, education,<br>and intakes of energy, cholesterol and fiber.                            |
| Mosley, 2013 <sup>15</sup>                                          | 2009 UP AMIGOS<br>cohort<br>(Mexico)                                | 339 M/F aged<br>18-25 yr                                                            | Dairy  | ≥3 vs. <3 ser/d                               | 0.34 (0.12-1.00) | Self-administered<br>FFQ | IDF/AHA joint criteria   | Age, sex, physical activity, family history of CVD and<br>T2DM, and energy intake.                                                |
| Sadeghi, 2014 <sup>16</sup>                                         | IHHP<br>(Iran)                                                      | 1752 M/F with a<br>mean age of 37.8<br>yr (<7 ser/wk) or<br>39.1 yr (≥7 ser/<br>wk) | Cheese | ≥7 vs. <7 ser/wk                              | 0.81 (0.71-0.94) | Interview-based<br>FFQ   | Modified NCEP<br>ATP-III | Age, sex, BMI, physical activity, dietary index, and<br>intakes of oil, grain, pulses, fruit and vegetable, meat,<br>and dairy.   |

AHA, American Heart Association; BMI, body mass index; BP, blood pressure; BWHHS, British Women's Heart and Health Study; CI, confidence interval; d, day; CVD, cardiovascular diseases; DESIR, Data from an Epidemiological Study on the Insulin Resistance syndrome; F, females; FFQ, food frequency questionnaire; IDF, International Diabetes Federation; mo, month; IHHP, Isfahan Health Heart Program; KNHANES, Korea National Health and Nutrition Examination Survey; M, males; MI, myocardial infarction; MetS, metabolic syndrome; NCEP ATP-III, Adult Treatment Panel III of the National Cholesterol Education Program; NHANES, National Health and Nutrition Examination Survey; N.R., not reported; OR, odds ratio; RR, relative risk; ser, servings; TLGS, Tehran Lipid and Glucose Study; T2DM, type 2 diabetes; UP AMIGOS, Universities of San Luis Potosí and Illinois: A Multidisciplinary Investigation on Genetics, Obesity, and Social-Environment; WHS, Women's Health Study; wk, week; WHO, World Health Organization; WHP, waist-hip ratio; yr, years.

## References

1. Mennen, L.I. *et al.* Possible protective effect of bread and dairy products on the risk of the metabolic syndrome. *Nutr Res* **20**, 335-347 (2000).
2. Lawlor, D.A., Ebrahim, S., Timpson, N. & Davey Smith, G. Avoiding milk is associated with a reduced risk of insulin resistance and the metabolic syndrome: findings from the British Women's Heart and Health Study. *Diabet Med* **22**, 808-811 (2005).
3. Azadbakht, L., Mirmiran, P., Esmailzadeh, A. & Azizi, F. Dairy consumption is inversely associated with the prevalence of the metabolic syndrome in Tehranian adults. *Am J Clin Nutr* **82**, 523-530 (2005).
4. Liu, S. *et al.* Dietary calcium, vitamin D, and the prevalence of metabolic syndrome in middle-aged and older U.S. women. *Diabetes Care* **28**, 2926-2932 (2005).
5. Elwood, P.C., Pickering, J.E. & Fehily, A.M. Milk and dairy consumption, diabetes and the metabolic syndrome: the Caerphilly prospective study. *J Epidemiol Community Health* **61**, 695-698 (2007).
6. Ruidavets, J.B. *et al.* High consumptions of grain, fish, dairy products and combinations of these are associated with a low prevalence of metabolic syndrome. *J Epidemiol Community Health* **61**, 810-817 (2007).
7. Snijder, M.B. *et al.* Is higher dairy consumption associated with lower body weight and fewer metabolic disturbances? The Hoorn Study. *Am J Clin Nutr* **85**, 989-995 (2007).
8. Beydoun, M.A. *et al.* Ethnic differences in dairy and related nutrient consumption among US adults and their association with obesity, central obesity, and the metabolic syndrome. *Am J Clin Nutr* **87**, 1914-1925 (2008).
9. Shin, A., Lim, S.Y., Sung, J., Shin, H.R. & Kim, J. Dietary intake, eating habits, and metabolic syndrome in Korean men. *J Am Diet Assoc* **109**, 633-640 (2009).
10. Troy, L.M., Jacques, P.F., Vasan, R.S. & McKeown, N.M. Dairy intake not associated with metabolic syndrome but milk and yogurt intake is inversely associated with prevalence of hypertension in middle-aged adults. *FASEB Journal* **24** (conference abstract) (2010).
11. Zhang, B. *et al.* Cross-sectional Study on Relationship between Dairy Consumption and Metabolic Syndrome. *J SUN Yat-sen Univ (Med Sci)* **31** 582-587 (in Chinese) (2010).
12. Kwon, H.T. *et al.* Milk intake and its association with metabolic syndrome in Korean: analysis of the third Korea National Health and Nutrition Examination Survey (KNHANES III). *J Korean Med Sci* **25**, 1473-1479 (2010).
13. de Oliveira, E.P., McLellan, K.C., Vaz de Arruda Silveira, L. & Burini, R.C. Dietary factors associated with metabolic syndrome in Brazilian adults. *Nutr J* **11**, 13 (2012).
14. Hosseinpour-Niazi, S., Mirmiran, P., Ejtahed, H., Nakhoda, K. & Azizi, F. Food groups, inflammatory markers and the metabolic syndrome in adults. *Iran J Endocrinol Metab* **15**, 340-351 (in Persian) (2013).
15. Mosley, M.A., Andrade, F.C., Aradillas-Garcia, C. & Teran-Garcia, M. Consumption of Dairy and Metabolic Syndrome Risk in a Convenient Sample of Mexican College Applicants. *Food and Nutrition Sciences* **4**, 56 (2013).
16. Sadeghi, M. *et al.* Cheese consumption in relation to cardiovascular risk factors among Iranian adults- IHHP Study. *Nutr Res Pract* **8**, 336-341 (2014).

Supplementary Table S3. Characteristics of included prospective cohort studies (N=7) on dairy products consumption and MetS.

| Study                      | Dataset<br>(Country)            | Duration,<br>yr | Participants              | Type of<br>dairy            | Comparison               | RR (95% CI)                                                       | Dairy assessment         | MetS assessment                                                                                       | Variables accounted for                                                                                                                                                                                                                                                                                                                                              |
|----------------------------|---------------------------------|-----------------|---------------------------|-----------------------------|--------------------------|-------------------------------------------------------------------|--------------------------|-------------------------------------------------------------------------------------------------------|----------------------------------------------------------------------------------------------------------------------------------------------------------------------------------------------------------------------------------------------------------------------------------------------------------------------------------------------------------------------|
| Pereira, 2002 <sup>1</sup> | CARDIA<br>(USA)                 | 10              | 3157 M/F aged<br>18-30 yr | Dairy                       | ≥35 vs. 0-10<br>ser/wk   | BMI≥25:<br>0.38 (0.17-0.83)<br><br>BMI<25:<br>0.72 (0.39-1.34)    | Food diary               | ≥2 of the 4<br>components: abnormal<br>glucose homeostasis,<br>obesity, elevated BP,<br>and dyslipid. | Age, sex, BMI, smoking, race, center, education,<br>physical activity, vitamin supplement, and intakes of<br>energy, alcohol, polyunsaturated fat, caffeine, dietary<br>fiber, whole and refined grains, meat, fruit, vegetables,<br>magnesium, calcium, and vitamin D.                                                                                              |
| Damiao, 2006 <sup>2</sup>  | JBDS<br>(Japan)                 | 7               | 151 M/F aged<br>40-79 yr  | Milk                        | 223.7 vs. 12.4 g/d       | 0.93 (0.28-3.00)                                                  | Self-administered<br>FFQ | Modified NCEP<br>ATP-III                                                                              | Age, sex, physical activity, smoking, education, and<br>intakes of alcohol, energy, fat, and fried foods.                                                                                                                                                                                                                                                            |
| Lutsey, 2008 <sup>3</sup>  | ARIC<br>(USA)                   | 9               | 9514 M/F aged<br>45-64 yr | Dairy                       | 3.30 vs. 0.28 ser/d      | 0.87 (0.77-0.98)                                                  | Interview-based<br>FFQ   | AHA guidelines                                                                                        | Age, sex, smoking, physical activity, race, education,<br>center, and intakes of energy, meat, fruit, vegetables,<br>whole grains, and refined grains.                                                                                                                                                                                                               |
| Snijder, 2008 <sup>4</sup> | Hoorn Study<br>(the Netherland) | 6.4             | 885 M/F aged<br>50-75 yr  | Dairy                       | ≥5.75 vs. ≤2.97<br>ser/d | 0.86 (0.52-1.42)                                                  | Self-administered<br>FFQ | NCEP ATP-III                                                                                          | Age, sex, smoking, physical activity, and intakes of<br>energy and alcohol.                                                                                                                                                                                                                                                                                          |
| Fumeron, 2011 <sup>5</sup> | DESIR<br>(France)               | 9               | 3435 M/F aged<br>30-65 yr | Dairy<br>(except<br>cheese) | >2 vs. <1 ser/d          | IDF:<br>0.88 (0.79-0.97)<br><br>NCEP ATP-III:<br>0.89 (0.79-1.00) | Self-administered<br>FFQ | IDF, NCEP ATP-III                                                                                     | Age, sex, BMI, smoking, physical activity, and fat<br>intake.                                                                                                                                                                                                                                                                                                        |
| Louie, 2013 <sup>6</sup>   | BMES<br>(Australia)             | 10              | 1824 M/F aged<br>≥49 yr   | Dairy                       | 3.1 vs. 0.5 ser/d        | 0.62 (0.24-1.62)                                                  | Self-administered<br>FFQ | Modified IDF<br>definition                                                                            | Age, sex, Smoking, physical activity, dietary glycemic<br>load, family history of T2D, and intakes of energy,<br>fiber from vegetables, and calcium.                                                                                                                                                                                                                 |
| Baik, 2013 <sup>7</sup>    | KoGES<br>(Korea)                | 6               | 5251 M/F aged<br>40-69 yr | Dairy                       | 1.6 vs. 0 ser/d          | 0.80 (0.66-0.96)                                                  | Interview-based<br>FFQ   | Modified NCEP<br>ATP-III                                                                              | Age, sex, smoking, physical activity, income,<br>occupation, education, study sites, FTO genotypes, and<br>intakes of alcohol, energy, refined grains and starches,<br>mixed grain rice and cereal, fish and seafood, red meat<br>and processed meat, poultry, eggs, legumes, nuts, fruit<br>and vegetable, sweetened carbonated beverage, green<br>tea, and coffee. |

AHA, American Heart Association; ARIC, Atherosclerosis Risk in Communities; BMES, Blue Mountains Eye Study; BMI, body mass index; CARDIA, Coronary Artery Risk Development in Young Adults; CI, confidence interval; d, day; DESIR, Data from an Epidemiological Study on the Insulin Resistance syndrome; F, Females; FFQ, food frequency questionnaire; IDF, International Diabetes Federation; MetS, metabolic syndrome; JBDS, Japanese-Brazilian Diabetes Study; KoGES, Korean Genome Epidemiology Study; M, males; NCEP ATP, Adult Treatment Panel III of the National Cholesterol Education Program; RR, relative risk; ser, servings; yr, years.

## References

1. Pereira, M.A. *et al.* Dairy consumption, obesity, and the insulin resistance syndrome in young adults: the CARDIA Study. *JAMA* **287**, 2081-2089 (2002).
2. Damiao, R., Castro, T.G., Cardoso, M.A., Gimeno, S.G. & Ferreira, S.R. Dietary intakes associated with metabolic syndrome in a cohort of Japanese ancestry. *Br J Nutr* **96**, 532-538 (2006).
3. Lutsey, P.L., Steffen, L.M. & Stevens, J. Dietary intake and the development of the metabolic syndrome: the Atherosclerosis Risk in Communities study. *Circulation* **117**, 754-761 (2008).
4. Snijder, M.B. *et al.* A prospective study of dairy consumption in relation to changes in metabolic risk factors: the Hoorn Study. *Obesity (Silver Spring)* **16**, 706-709 (2008).
5. Fumeron, F. *et al.* Dairy consumption and the incidence of hyperglycemia and the metabolic syndrome: results from a french prospective study, Data from the Epidemiological Study on the Insulin Resistance Syndrome (DESIR). *Diabetes Care* **34**, 813-817 (2011).
6. Louie, J.C. *et al.* Higher regular fat dairy consumption is associated with lower incidence of metabolic syndrome but not type 2 diabetes. *Nutr Metab Cardiovasc Dis* **23**, 816-821 (2013).
7. Baik, I., Lee, M., Jun, N.R., Lee, J.Y. & Shin, C. A healthy dietary pattern consisting of a variety of food choices is inversely associated with the development of metabolic syndrome. *Nutr Res Pract* **7**, 233-241 (2013).



Supplementary Table S4. Studies reporting results for the association between individual dairy products and MetS.

| Study                          | Country   | Reported results                           |                                            |                                            |                                                                 |                                                                     |
|--------------------------------|-----------|--------------------------------------------|--------------------------------------------|--------------------------------------------|-----------------------------------------------------------------|---------------------------------------------------------------------|
|                                |           | Cheese                                     | Yogurt                                     | Butter                                     | High-fat dairy                                                  | Low-fat dairy                                                       |
| <i>Cross-sectional studies</i> |           |                                            |                                            |                                            |                                                                 |                                                                     |
| Liu, 2005 <sup>1</sup>         | USA       | None                                       | None                                       | None                                       | High-fat dairy (high vs. low):<br>OR=0.71 (95% CI=0.58-0.87)    | Low-fat dairy (high vs. low):<br>OR=0.78 (95% CI=0.64-0.95)         |
| Beydoun, 2008 <sup>2</sup>     | USA       | Per 1 ser/d: OR=1.16<br>(95% CI=1.04-1.29) | Per 1 ser/d: OR=0.40<br>(95% CI=0.18-0.89) | None                                       | Whole milk (per 100 g/d):<br>OR=0.98 (95% CI=0.90-1.07)         | Low fat milk (per 100 g/d):<br>OR=1.02 (95% CI=0.97-1.06)           |
| Mosley, 2013 <sup>3</sup>      | Mexico    | High vs low: OR=0.59<br>(95% CI=0.29-1.43) | None                                       | None                                       | Whole milk (high vs. low):<br>OR=0.63 (95% CI=0.29-1.25)        | None                                                                |
| Sadeghi, 2014 <sup>4</sup>     | Iran      | High vs low: OR=0.81<br>(95% CI=0.71-0.94) | None                                       | None                                       | None                                                            | None                                                                |
| <i>Cohort studies</i>          |           |                                            |                                            |                                            |                                                                 |                                                                     |
| Pereira, 2002 <sup>5</sup>     | USA       | None                                       | Per 1 ser/d: RR=0.58<br>(95% CI=0.20-1.66) | Per 1 ser/d: RR=0.90<br>(95% CI=0.76-1.05) | None                                                            | None                                                                |
| Fumeron, 2011 <sup>6</sup>     | France    | High vs low: RR=0.82<br>(95% CI=0.71-0.95) | None                                       | None                                       | None                                                            | None                                                                |
| Louie, 2013 <sup>7</sup>       | Australia | None                                       | None                                       | None                                       | Regular fat dairy (high vs. low):<br>RR=0.39 (95% CI=0.22-0.70) | Regular/low fat dairy (high vs. low):<br>RR=2.01 (95% CI=1.05-3.83) |

CI, confidence interval; MetS, metabolic syndrome; OR, odds ratio; RR, relative risk.

## References

1. Liu, S. *et al.* Dietary calcium, vitamin D, and the prevalence of metabolic syndrome in middle-aged and older U.S. women. *Diabetes Care* **28**, 2926-2932 (2005).
2. Beydoun, M.A. *et al.* Ethnic differences in dairy and related nutrient consumption among US adults and their association with obesity, central obesity, and the metabolic syndrome. *Am J Clin Nutr* **87**, 1914-1925 (2008).
3. Mosley, M.A., Andrade, F.C., Aradillas-Garcia, C. & Teran-Garcia, M. Consumption of Dairy and Metabolic Syndrome Risk in a Convenient Sample of Mexican College Applicants. *Food and Nutrition Sciences* **4**, 56 (2013).
4. Sadeghi, M. *et al.* Cheese consumption in relation to cardiovascular risk factors among Iranian adults- IHHP Study. *Nutr Res Pract* **8**, 336-341 (2014).
5. Pereira, M.A. *et al.* Dairy consumption, obesity, and the insulin resistance syndrome in young adults: the CARDIA Study. *JAMA* **287**, 2081-2089 (2002).
6. Fumeron, F. *et al.* Dairy consumption and the incidence of hyperglycemia and the metabolic syndrome: results from a french prospective study, Data from the Epidemiological Study on the Insulin Resistance Syndrome (DESIR). *Diabetes Care* **34**, 813-817 (2011).
7. Louie, J.C. *et al.* Higher regular fat dairy consumption is associated with lower incidence of metabolic syndrome but not type 2 diabetes. *Nutr Metab Cardiovasc Dis* **23**, 816-821 (2013).

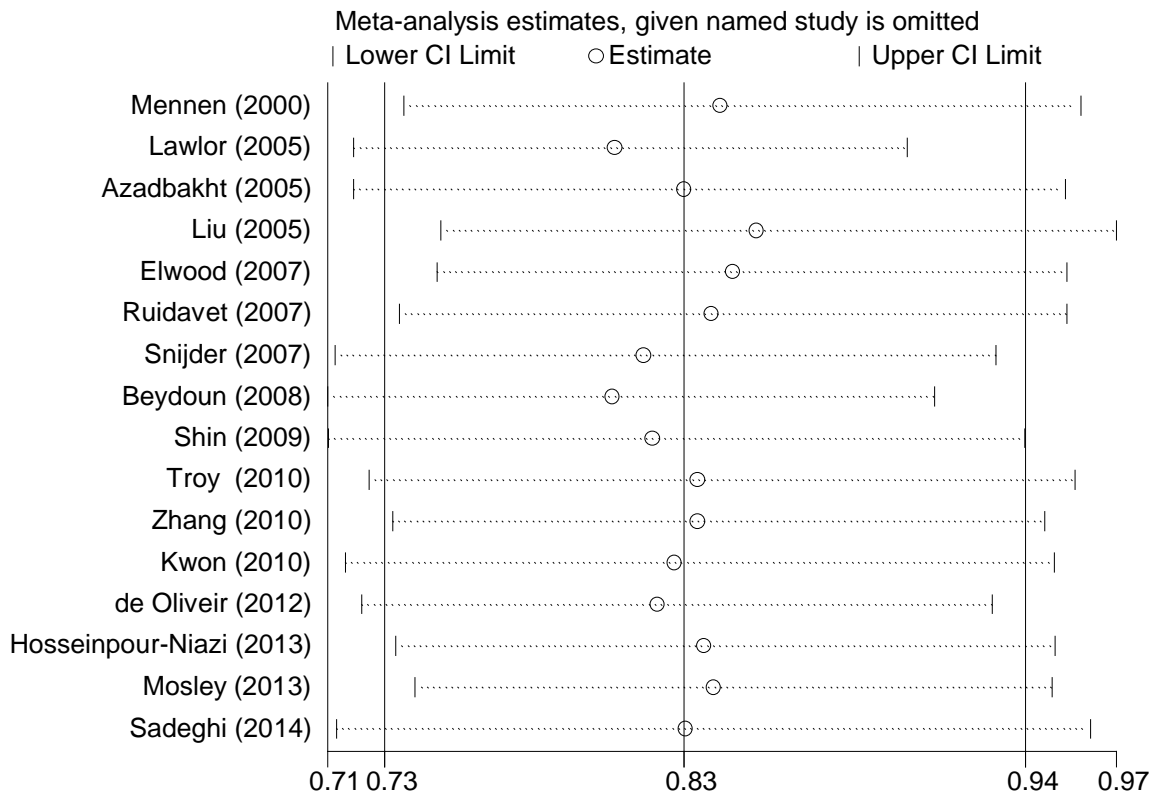

Supplementary Figure S1. Sensitivity analysis for cross-sectional/case-control studies, omitting one at a time with the remaining studies pooled.

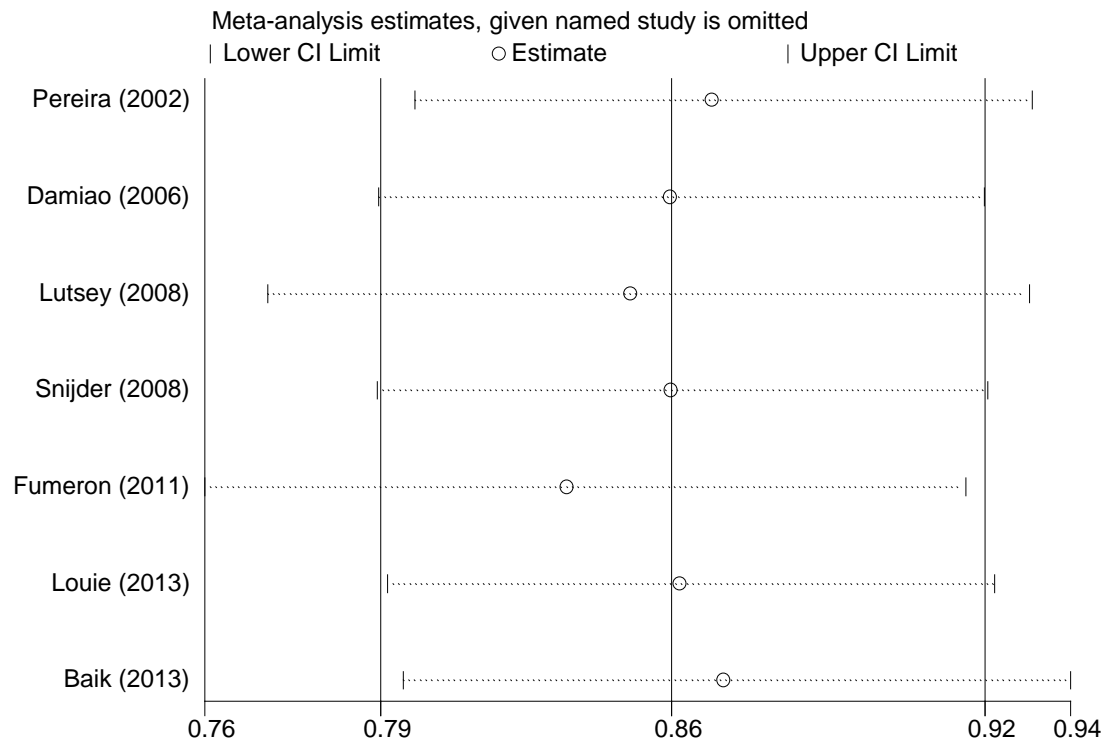

Supplementary Figure S2. Sensitivity analysis for prospective cohort studies, omitting one at a time with the remaining studies pooled.
